# Supplementary material
Source: publisher figshare collection journal article supplement (https://karger.figshare.com/articles/dataset/_/25623405)
Supplement: Supplementary file 1 [file 1]

Supplementary figure 1

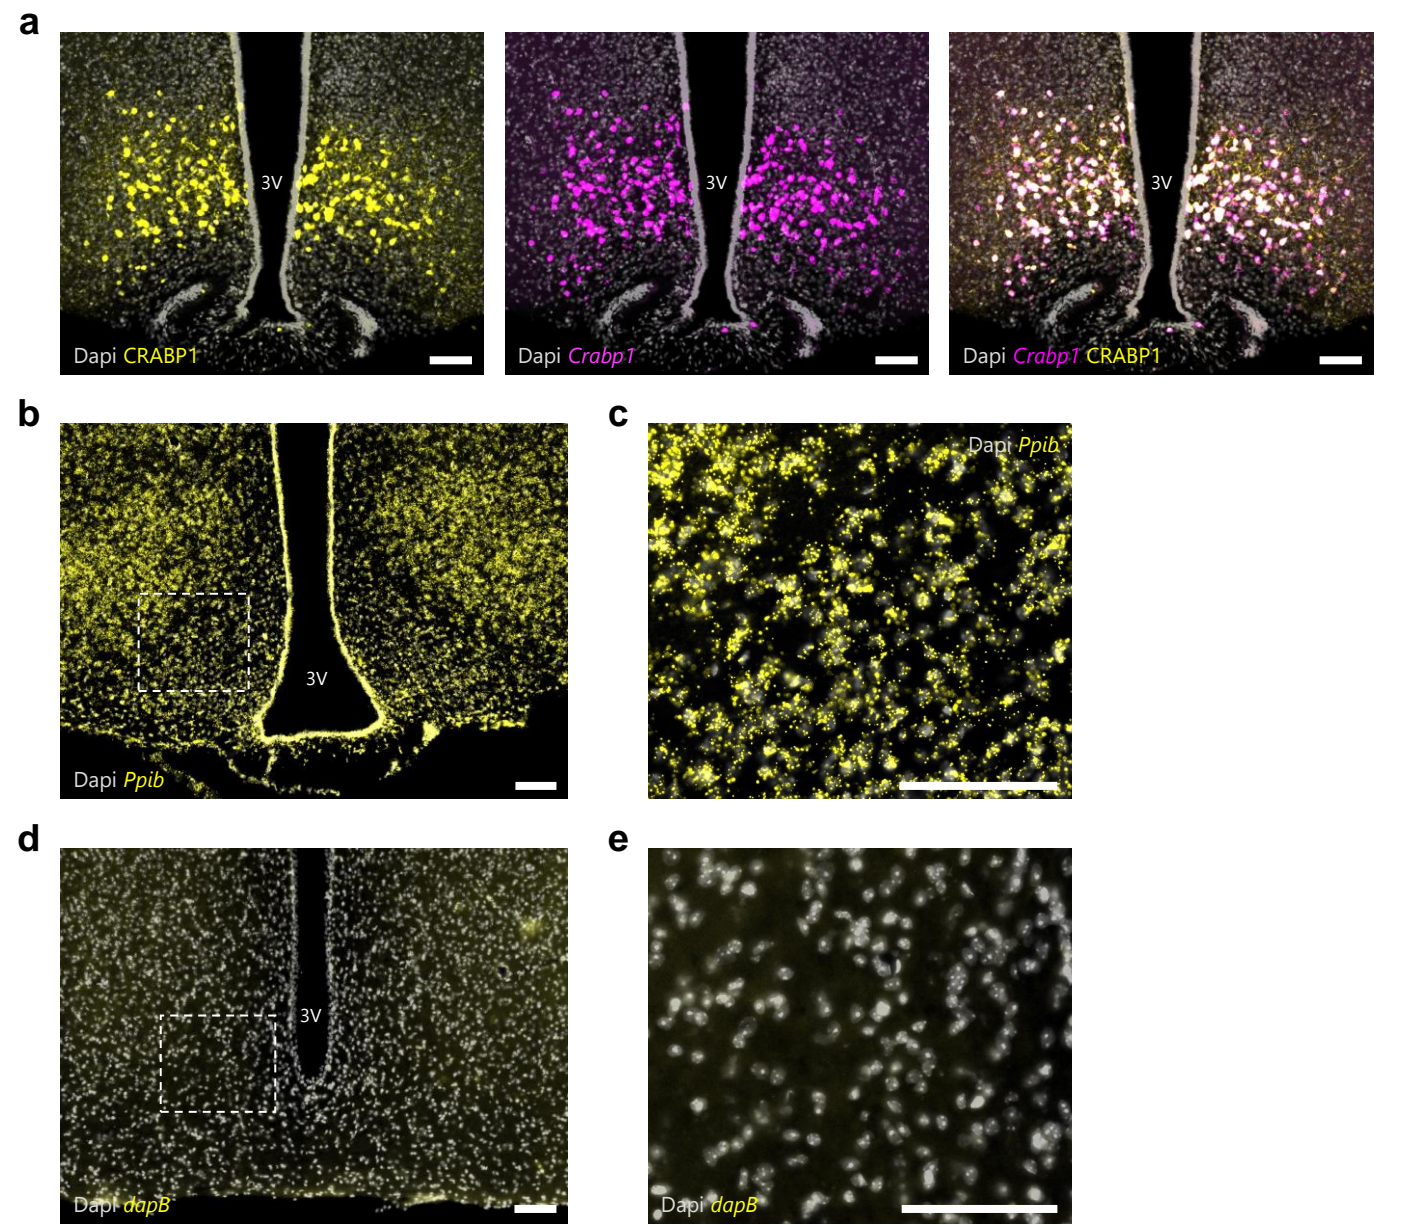

**Supplementary Fig. 1. Validation controls for immunohistochemistry and fluorescent *in situ* hybridization experiments.** **a** Representative fluorescent *in situ* hybridization combined with immunofluorescence images of CRABP1 and *Crabp1* expression within the ARC. **b** Representative fluorescent *in situ* hybridization image of *Ppib* expression (positive control) within the ARC. **c** Higher magnification of the framed region highlighted in (b). Signal for *Ppib* expression is detected in all cells. **d** Representative fluorescent *in situ* hybridization image of *dapB* expression (negative control) within the ARC. **e** Higher magnification of the framed region highlighted in (d). No signal is detected for *dapB* expression.
