# Supplementary material
Source: publisher figshare collection journal article supplement (https://karger.figshare.com/articles/dataset/_/25623405)
Supplement: Supplementary file 2 [file 1]

Supplementary figure 3

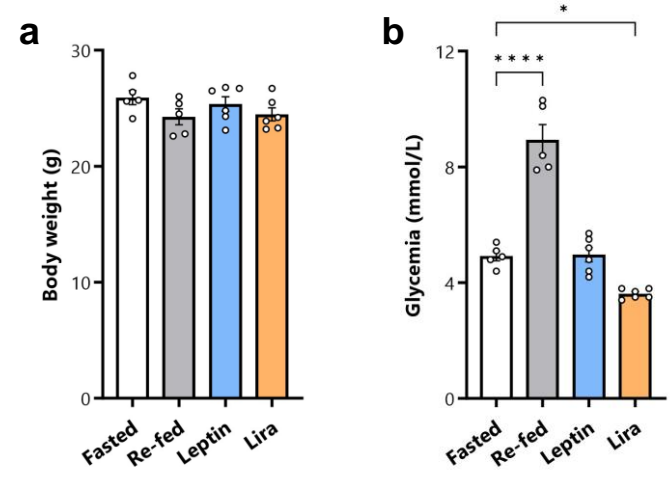

**Supplementary Fig. 3. Body weight and glycemia for cFOS cohorts.** **a** Body weight of mice used for cFOS experiments. Measures were taken after the overnight fast, but before re-feeding and injections. Fasted: 25.9 ± 0.6 g, re-fed: 24.3 ± 0.7 g, leptin: 25.4 ± 0.6 g, liraglutide: 24.5 ± 0.6 g. **b** Glycemia of mice used for cFOS experiments. Measures were taken after re-feeding and injections, and before sacrifice. Fasted: 4.9 ± 0.2 mmol/L, re-fed: 8.9 ± 0.5 mmol/L, leptin: 5.0 ± 0.2 mmol/L, liraglutide: 3.6 ± 0.1 mmol/L. Re-fed versus fasted ( $p < 0.0001$ ). Liraglutide versus fasted ( $p = 0.0217$ ). One way ANOVA with Dunnett's multiple comparison tests. For fasted and re-fed groups,  $n = 5$  ♂ mice per group. For leptin and liraglutide groups,  $n = 6$  ♂ mice per group. Data is presented as mean ± SEM.
