# Supplementary material
Source: publisher figshare collection journal article supplement (https://karger.figshare.com/articles/dataset/_/25623405)
Supplement: Supplementary file 3 [file 1]

Supplementary figure 2

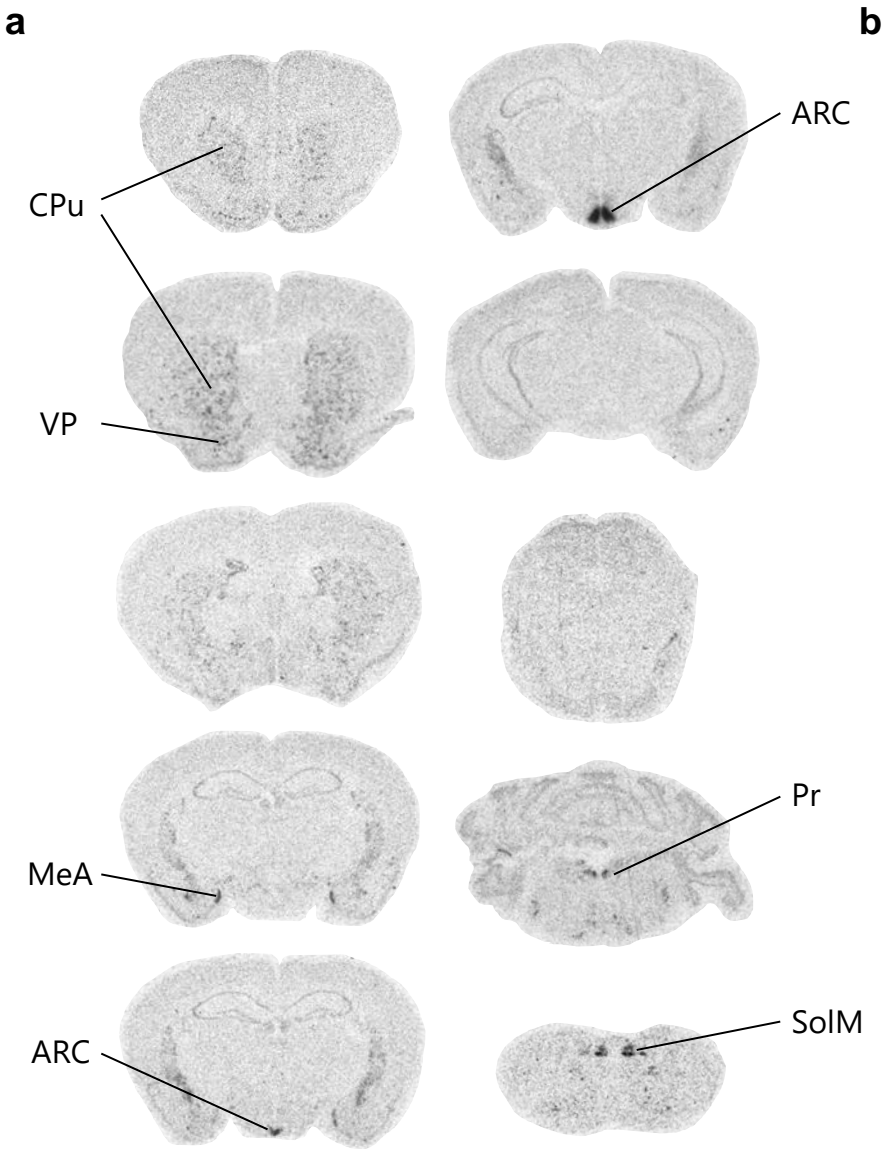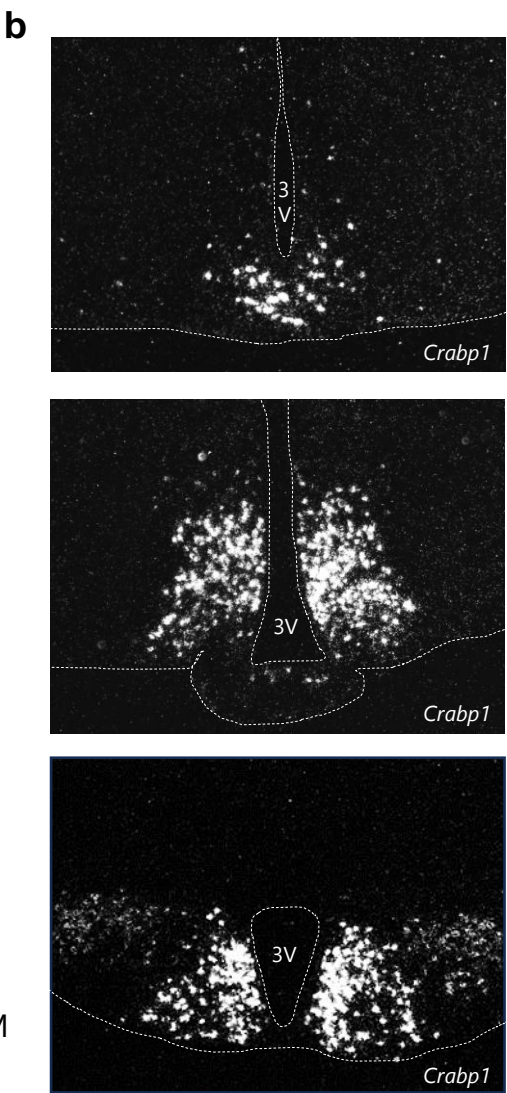

**Supplementary Fig. 2. Neuroanatomical distribution of *Crabp1* across the mouse brain.** **a** Rostro-caudal analysis of *Crabp1* expression across the mouse brain using *in situ* hybridization with <sup>35</sup>S-labeled riboprobes. Brain areas where *Crabp1*+ signal was detected are identified. **b** Representative *in situ* hybridization darkfield images of *Crabp1* across the ARC.
